# Supplementary material for: Identifying the Toxicological Effects of Per- and Polyfluoroalkyl Substances Exposure on Osteoarthritis and Verifying through Molecular Docking
Source: Research Square preprint supplement (doi:10.21203/rs.3.rs-6497810/v1), 2025-05-13
Supplement: Supplementary file 1 [file 4264c501937d5bcaa9d11b51.docx]

Sup Fig.1. The PFAS-target-OA interaction network of 31 intersecting target genes.
