# Supplementary material for: Identifying the Toxicological Effects of Per- and Polyfluoroalkyl Substances Exposure on Osteoarthritis and Verifying through Molecular Docking
Source: Research Square preprint supplement (doi:10.21203/rs.3.rs-6497810/v1), 2025-05-13
Supplement: Supplementary file 2 [file 67010271afc6c2870ce1dd5c.xlsx]

## Sheet: Sheet1
Table 1. Parameter settings and validation techniques of machine learning algorithms
Machine Learning Algorithm	Introduction	Parameter Settings	Validation Techniques
SVM	SVM is a powerful supervised learning algorithm used for classification and regression tasks. It works by finding the optimal hyperplane that maximizes the margin between different classes, making it effective for high-dimensional data and datasets with clear margins of separation.	C: The penalty parameter; kernel: The type of kernel function used in the algorithm; gamma: Kernel coefficient; degree: Degree of the polynomial kernel function; coef0: Independent term in kernel function.	Grid Search: Exhaustively searches over specified parameter values for an estimator; Cross Validation: k-fold cross-validation to assess the model's generalization ability.
Ridge	Ridge Regression is a linear regression technique that includes an L2 regularization term to prevent overfitting. It adds a penalty to the square of the magnitude of the coefficients, which helps in reducing model complexity and improving generalization, especially in the presence of multicollinearity.	alpha: Regularization strength; fit_intercept: Whether to calculate the intercept for this model; normalize: This parameter is ignored when fit_intercept is set to False.	Cross Validation: Use RidgeCV class to perform k-fold cross-validation to determine the optimal alpha value.
glmBoost	glmBoost is an ensemble learning method that combines multiple weak learners (usually decision trees) to form a strong predictive model. It iteratively improves the model by focusing on the errors made by previous iterations, making it effective for complex datasets and improving prediction accuracy.	Learning Rate: Controls the contribution of each tree to the final model; Number of Trees; Tree Depth.	Cross Validation: Use k-fold cross-validation to assess the model's performance and select the best parameters.
Lasso	Lasso is a linear regression technique that includes an L1 regularization term. It adds a penalty to the absolute value of the coefficients, which can lead to sparse models where some coefficients are exactly zero. This makes Lasso useful for feature selection and handling high-dimensional data.	alpha: Regularization strength; max_iter: The maximum number of iterations.	Cross Validation: Use LassoCV class to perform k-fold cross-validation to determine the optimal alpha value.
Stepglm	Stepglm is a method for building generalized linear models by iteratively adding or removing predictors based on statistical criteria like AIC (Akaike Information Criterion) or BIC (Bayesian Information Criterion). It helps in selecting the most significant features and improving model interpretability.	Direction: Forward selection, backward elimination, or stepwise selection; Criterion: AIC (Akaike Information Criterion) or BIC (Bayesian Information Criterion).	Stepwise Selection: Build the model by selecting variables stepwise, using AIC or BIC as the selection criterion.
plsRglm	plsRglm combines partial least squares (PLS) dimensionality reduction with generalized linear models. It is particularly useful for datasets with highly correlated predictors, as PLS reduces the dimensionality while retaining important information, making it suitable for regression and classification tasks.	Number of Components; Scaling	Cross Validation: Use k-fold cross-validation to assess the model's performance and select the optimal number of components.
RF	Random Forest is an ensemble learning method that builds multiple decision trees and merges them to get a more accurate and stable prediction. It handles overfitting by averaging or combining the results of individual trees and is effective for both classification and regression tasks.	Number of Trees; Max Depth; Min Samples Split: The minimum number of samples required to split an internal node.	Out-of-Bag Estimation: Use the data not included in the bootstrap sample to estimate the model's performance; Cross Validation: Use k-fold cross-validation to assess the model's performance.
GBM	GBM is an ensemble technique that builds models in a stage-wise fashion, focusing on correcting the errors made by previous models. It combines multiple weak learners (usually decision trees) to form a strong predictive model, making it highly effective for complex datasets and improving prediction accuracy.	Learning Rate: Controls the contribution of each tree to the final model; Number of Trees; Tree Depth.	Cross Validation: Use k-fold cross-validation to assess the model's performance and select the best parameters.
LDA	LDA is a method used for classification and dimensionality reduction. It works by projecting the features in a way that maximizes the separation between multiple classes. LDA is particularly useful when the classes are well-separated and the data follows a Gaussian distribution.	Prior Probabilities: The prior probabilities of each class; Regularization Parameter: Controls the regularization strength of the model;	Cross Validation: Use k-fold cross-validation to assess the model's performance.
XGBoost	XGBoost is an optimized distributed gradient boosting library designed to be highly efficient, flexible, and portable. It implements machine learning algorithms under the Gradient Boosting framework and provides a parallel tree boosting (also known as GBDT, GBM) that solves many data science problems in a fast and accurate way.	Learning Rate: Controls the contribution of each tree to the final model; Number of Trees; Tree Depth; Regularization Parameters: lambda (L2 regularization) and alpha (L1 regularization)	Cross Validation: Use k-fold cross-validation to assess the model's performance and select the best parameters.
NaiveBayes	Naive Bayes is a probabilistic classifier based on Bayes' theorem with the assumption of independence between predictors. It is particularly useful for text classification, spam filtering, and sentiment analysis due to its simplicity and effectiveness in handling high-dimensional datasets.	Prior Probabilities: The prior probabilities of each class; Smoothing Parameter: the Laplace smoothing parameter.	Cross Validation: Use k-fold cross-validation to assess the model's performance.
