# Supplementary material for: Identifying the Toxicological Effects of Per- and Polyfluoroalkyl Substances Exposure on Osteoarthritis and Verifying through Molecular Docking
Source: Research Square preprint supplement (doi:10.21203/rs.3.rs-6497810/v1), 2025-05-13
Supplement: Supplementary file 3 [file cfdca1c932fa219e084e6880.xlsx]

## Sheet: Sheet1
Table 4. Vina Score of Ligands and Receptors
ligand	receptor	Vina Score
PFOS	ABCB1	-8.3
PFOS	DNMT1	-9.3
PFOS	ESR1	-10
PFOS	FGFR2	-8.4
PFOA	ABCB1	-7.5
PFOA	DNMT1	-8.2
PFOA	ESR1	-8.8
PFOA	FGFR2	-7.6
PFHxS	ABCB1	-7.4
PFHxS	DNMT1	-8
PFHxS	ESR1	-8.4
PFHxS	FGFR2	-7.1
