# Supplementary material for: Identifying the Toxicological Effects of Per- and Polyfluoroalkyl Substances Exposure on Osteoarthritis and Verifying through Molecular Docking
Source: Research Square preprint supplement (doi:10.21203/rs.3.rs-6497810/v1), 2025-05-13
Supplement: Supplementary file 4 [file d87cb0cd644c1e1474dd9bbf.xlsx]

## Sheet: Sheet1
Table 2. The chemical formula, SMILES structure, and molecular weight (g/mol) of the three types of PFAS.
Per- and Polyfluoroalkyl Substances, PFAS	Chemical Formula	SMILES Structure	MW (g/mol)
(Perfluorooctanesulfonic acid, PFOS)	C₈F₁₇SO₃H	C(C(C(C(C(F)(F)S(=O)(=O)O)(F)F)(F)F)(F)F)(C(C(C(F)(F)F)(F)F)(F)F)(F)F	500.13
(Perfluorooctanoic acid, PFOA)	C₈HF₁₅O₂	C(=O)(C(C(C(C(C(C(C(F)(F)F)(F)F)(F)F)(F)F)(F)F)(F)F)(F)F)O	414.07
(Perfluorohexanesulfonic Acid, PFHxS)	C₆F₁₃SO₃H	C(C(C(C(F)(F)S(=O)(=O)O)(F)F)(F)F)(C(C(F)(F)F)(F)F)(F)F	400.12
