# Supplementary material for: Identifying the Toxicological Effects of Per- and Polyfluoroalkyl Substances Exposure on Osteoarthritis and Verifying through Molecular Docking
Source: Research Square preprint supplement (doi:10.21203/rs.3.rs-6497810/v1), 2025-05-13
Supplement: Supplementary file 5 [file db3e924f0ac5c625d4f396a2.xlsx]

## Sheet: ProTox
Table 3. ProTox and ADMETlab - Prediction of TOXicity of chemicals
PFOS
Classification	Target	Prediction	Probability
Organ toxicity	Hepatotoxicity	Inactive	0.89
Organ toxicity	Neurotoxicity	Inactive	0.94
Organ toxicity	Nephrotoxicity	Inactive	0.52
Organ toxicity	Respiratory toxicity	Active	0.54
Organ toxicity	Cardiotoxicity	Inactive	0.88
Toxicity end points	Carcinogenicity	Inactive	0.68
Toxicity end points	Immunotoxicity	Inactive	0.99
Toxicity end points	Mutagenicity	Inactive	0.64
Toxicity end points	Cytotoxicity	Inactive	0.75
Toxicity end points	BBB-barrier	Active	0.91
Toxicity end points	Ecotoxicity	Inactive	0.61
Toxicity end points	Clinical toxicity	Inactive	0.76
Toxicity end points	Nutritional toxicity	Inactive	0.86
Tox21-Nuclear receptor signalling pathways	Aryl hydrocarbon Receptor (AhR)	Inactive	1
Tox21-Nuclear receptor signalling pathways	Androgen Receptor (AR)	Inactive	1
Tox21-Nuclear receptor signalling pathways	Androgen Receptor Ligand Binding Domain (AR-LBD)	Inactive	1
Tox21-Nuclear receptor signalling pathways	Aromatase	Inactive	0.99
Tox21-Nuclear receptor signalling pathways	Estrogen Receptor Alpha (ER)	Inactive	0.99
Tox21-Nuclear receptor signalling pathways	Estrogen Receptor Ligand Binding Domain (ER-LBD)	Inactive	0.98
Tox21-Nuclear receptor signalling pathways	Peroxisome Proliferator Activated Receptor Gamma (PPAR-Gamma)	Inactive	1
Tox21-Stress response pathways	Nuclear factor (erythroid-derived 2)-like 2/antioxidant responsive element (nrf2/ARE)	Inactive	0.96
Tox21-Stress response pathways	Heat shock factor response element (HSE)	Inactive	0.96
Tox21-Stress response pathways	Mitochondrial Membrane Potential (MMP)	Inactive	0.93
Tox21-Stress response pathways	Phosphoprotein (Tumor Supressor) p53	Inactive	0.97
Tox21-Stress response pathways	ATPase family AAA domain-containing protein 5 (ATAD5)	Inactive	1
Molecular Initiating Events	Thyroid hormone receptor alpha (THRα)	Inactive	0.9
Molecular Initiating Events	Thyroid hormone receptor beta (THRβ)	Inactive	0.78
Molecular Initiating Events	Transtyretrin (TTR)	Inactive	0.97
Molecular Initiating Events	Ryanodine receptor (RYR)	Inactive	0.98
Molecular Initiating Events	GABA receptor (GABAR)	Inactive	0.96
Molecular Initiating Events	Glutamate N-methyl-D-aspartate receptor (NMDAR)	Inactive	0.92
Molecular Initiating Events	alpha-amino-3-hydroxy-5-methyl-4-isoxazolepropionate receptor (AMPAR)	Inactive	0.97
Molecular Initiating Events	Kainate receptor (KAR)	Inactive	0.99
Molecular Initiating Events	Achetylcholinesterase (AChE)	Inactive	0.89
Molecular Initiating Events	Constitutive androstane receptor (CAR)	Inactive	0.98
Molecular Initiating Events	Pregnane X receptor (PXR)	Inactive	0.92
Molecular Initiating Events	NADH-quinone oxidoreductase (NADHOX)	Inactive	0.97
Molecular Initiating Events	Voltage gated sodium channel (VGSC)	Inactive	0.95
Molecular Initiating Events	Na+/I- symporter (NIS)	Inactive	0.98
Metabolism	Cytochrome CYP1A2	Inactive	0.93
Metabolism	Cytochrome CYP2C19	Inactive	0.89
Metabolism	Cytochrome CYP2C9	Inactive	0.6
Metabolism	Cytochrome CYP2D6	Inactive	0.87
Metabolism	Cytochrome CYP3A4	Inactive	0.99
Metabolism	Cytochrome CYP2E1	Inactive	0.9
PFOA
Classification	Target	Prediction	Probability
Organ toxicity	Hepatotoxicity	Inactive	0.81
Organ toxicity	Neurotoxicity	Inactive	0.88
Organ toxicity	Nephrotoxicity	Active	0.51
Organ toxicity	Respiratory toxicity	Inactive	0.59
Organ toxicity	Cardiotoxicity	Inactive	0.89
Toxicity end points	Carcinogenicity	Active	0.63
Toxicity end points	Immunotoxicity	Inactive	0.99
Toxicity end points	Mutagenicity	Inactive	0.92
Toxicity end points	Cytotoxicity	Inactive	0.68
Toxicity end points	BBB-barrier	Active	0.97
Toxicity end points	Ecotoxicity	Inactive	0.85
Toxicity end points	Clinical toxicity	Inactive	0.79
Toxicity end points	Nutritional toxicity	Inactive	0.92
Tox21-Nuclear receptor signalling pathways	Aryl hydrocarbon Receptor (AhR)	Inactive	1
Tox21-Nuclear receptor signalling pathways	Androgen Receptor (AR)	Inactive	1
Tox21-Nuclear receptor signalling pathways	Androgen Receptor Ligand Binding Domain (AR-LBD)	Inactive	1
Tox21-Nuclear receptor signalling pathways	Aromatase	Inactive	1
Tox21-Nuclear receptor signalling pathways	Estrogen Receptor Alpha (ER)	Inactive	1
Tox21-Nuclear receptor signalling pathways	Estrogen Receptor Ligand Binding Domain (ER-LBD)	Inactive	1
Tox21-Nuclear receptor signalling pathways	Peroxisome Proliferator Activated Receptor Gamma (PPAR-Gamma)	Inactive	1
Tox21-Stress response pathways	Nuclear factor (erythroid-derived 2)-like 2/antioxidant responsive element (nrf2/ARE)	Inactive	1
Tox21-Stress response pathways	Heat shock factor response element (HSE)	Inactive	1
Tox21-Stress response pathways	Mitochondrial Membrane Potential (MMP)	Inactive	1
Tox21-Stress response pathways	Phosphoprotein (Tumor Supressor) p53	Active	0.77
Tox21-Stress response pathways	ATPase family AAA domain-containing protein 5 (ATAD5)	Inactive	1
Molecular Initiating Events	Thyroid hormone receptor alpha (THRα)	Inactive	0.9
Molecular Initiating Events	Thyroid hormone receptor beta (THRβ)	Inactive	0.78
Molecular Initiating Events	Transtyretrin (TTR)	Inactive	0.97
Molecular Initiating Events	Ryanodine receptor (RYR)	Inactive	0.98
Molecular Initiating Events	GABA receptor (GABAR)	Inactive	0.96
Molecular Initiating Events	Glutamate N-methyl-D-aspartate receptor (NMDAR)	Inactive	0.92
Molecular Initiating Events	alpha-amino-3-hydroxy-5-methyl-4-isoxazolepropionate receptor (AMPAR)	Inactive	0.97
Molecular Initiating Events	Kainate receptor (KAR)	Inactive	0.99
Molecular Initiating Events	Achetylcholinesterase (AChE)	Inactive	0.81
Molecular Initiating Events	Constitutive androstane receptor (CAR)	Inactive	0.98
Molecular Initiating Events	Pregnane X receptor (PXR)	Inactive	0.92
Molecular Initiating Events	NADH-quinone oxidoreductase (NADHOX)	Inactive	0.97
Molecular Initiating Events	Voltage gated sodium channel (VGSC)	Inactive	0.95
Molecular Initiating Events	Na+/I- symporter (NIS)	Inactive	0.98
Metabolism	Cytochrome CYP1A2	Inactive	0.9
Metabolism	Cytochrome CYP2C19	Inactive	0.86
Metabolism	Cytochrome CYP2C9	Inactive	0.55
Metabolism	Cytochrome CYP2D6	Inactive	0.87
Metabolism	Cytochrome CYP3A4	Inactive	0.99
Metabolism	Cytochrome CYP2E1	Inactive	0.99
PFHxS
Classification	Target	Prediction	Probability
Organ toxicity	Hepatotoxicity	Inactive	0.89
Organ toxicity	Neurotoxicity	Inactive	0.94
Organ toxicity	Nephrotoxicity	Inactive	0.52
Organ toxicity	Respiratory toxicity	Active	0.54
Organ toxicity	Cardiotoxicity	Inactive	0.88
Toxicity end points	Carcinogenicity	Inactive	0.68
Toxicity end points	Immunotoxicity	Inactive	0.99
Toxicity end points	Mutagenicity	Inactive	0.64
Toxicity end points	Cytotoxicity	Inactive	0.75
Toxicity end points	BBB-barrier	Active	0.91
Toxicity end points	Ecotoxicity	Inactive	0.61
Toxicity end points	Clinical toxicity	Inactive	0.76
Toxicity end points	Nutritional toxicity	Inactive	0.86
Tox21-Nuclear receptor signalling pathways	Aryl hydrocarbon Receptor (AhR)	Inactive	1
Tox21-Nuclear receptor signalling pathways	Androgen Receptor (AR)	Inactive	1
Tox21-Nuclear receptor signalling pathways	Androgen Receptor Ligand Binding Domain (AR-LBD)	Inactive	1
Tox21-Nuclear receptor signalling pathways	Aromatase	Inactive	0.99
Tox21-Nuclear receptor signalling pathways	Estrogen Receptor Alpha (ER)	Inactive	0.99
Tox21-Nuclear receptor signalling pathways	Estrogen Receptor Ligand Binding Domain (ER-LBD)	Inactive	0.98
Tox21-Nuclear receptor signalling pathways	Peroxisome Proliferator Activated Receptor Gamma (PPAR-Gamma)	Inactive	1
Tox21-Stress response pathways	Nuclear factor (erythroid-derived 2)-like 2/antioxidant responsive element (nrf2/ARE)	Inactive	0.96
Tox21-Stress response pathways	Heat shock factor response element (HSE)	Inactive	0.96
Tox21-Stress response pathways	Mitochondrial Membrane Potential (MMP)	Inactive	0.93
Tox21-Stress response pathways	Phosphoprotein (Tumor Supressor) p53	Inactive	0.97
Tox21-Stress response pathways	ATPase family AAA domain-containing protein 5 (ATAD5)	Inactive	1
Molecular Initiating Events	Thyroid hormone receptor alpha (THRα)	Inactive	0.9
Molecular Initiating Events	Thyroid hormone receptor beta (THRβ)	Inactive	0.78
Molecular Initiating Events	Transtyretrin (TTR)	Inactive	0.97
Molecular Initiating Events	Ryanodine receptor (RYR)	Inactive	0.98
Molecular Initiating Events	GABA receptor (GABAR)	Inactive	0.96
Molecular Initiating Events	Glutamate N-methyl-D-aspartate receptor (NMDAR)	Inactive	0.92
Molecular Initiating Events	alpha-amino-3-hydroxy-5-methyl-4-isoxazolepropionate receptor (AMPAR)	Inactive	0.97
Molecular Initiating Events	Kainate receptor (KAR)	Inactive	0.99
Molecular Initiating Events	Achetylcholinesterase (AChE)	Inactive	0.89
Molecular Initiating Events	Constitutive androstane receptor (CAR)	Inactive	0.98
Molecular Initiating Events	Pregnane X receptor (PXR)	Inactive	0.92
Molecular Initiating Events	NADH-quinone oxidoreductase (NADHOX)	Inactive	0.97
Molecular Initiating Events	Voltage gated sodium channel (VGSC)	Inactive	0.95
Molecular Initiating Events	Na+/I- symporter (NIS)	Inactive	0.98
Metabolism	Cytochrome CYP1A2	Inactive	0.93
Metabolism	Cytochrome CYP2C19	Inactive	0.89
Metabolism	Cytochrome CYP2C9	Inactive	0.6
Metabolism	Cytochrome CYP2D6	Inactive	0.87
Metabolism	Cytochrome CYP3A4	Inactive	0.99
Metabolism	Cytochrome CYP2E1	Inactive	0.9

## Sheet: ADMETlab
ADMETlab
PFOS			PFOA			PFHxS
Property	Value		Property	Value		Property	Value
Eye Corrosion	0.981		Eye Corrosion	0.997		Eye Corrosion	0.991
Respiratory Toxicity	0.981		Respiratory Toxicity	0.932		Respiratory Toxicity	0.983
Skin Sensiti zation	0.929		Eye Irritation	0.909		Skin Sensitization	0.911
Eye Irritation	0.873		Skin Sensitization	0.877		Eye Irritation	0.871
